# Supplementary material for: A genome-wide analysis of carbon catabolite repression in Schizosaccharomyces pombe
Source: BMC Genomics. 2019 Mar 29;20:251. doi: 10.1186/s12864-019-5602-8 (PMC6440086; doi:10.1186/s12864-019-5602-8)
Supplement: Supplementary file 11 — Table S10. Strains used in this study. (XLSX 10 kb) [file 12864_2019_5602_MOESM11_ESM.xlsx]

## Sheet: Table_S10
Strains used in this study
Strain	Genotype	Source
Y9	h90	Monahan Lab
Y38	h90	Monahan Lab
Y39	h- ura4-d18 leu1-32 ade6-m210	Monahan Lab
Y44	h-	Monahan Lab
Y46	h+	Monahan Lab
Y50	h+ ura4-d18 leu1-32 ade6-m216	Monahan Lab
Y47	h+ ura4-d18 leu1-32 ade6-m216 tup11::ura4+ tup12::ura4+ scr1::ura4+	Monahan Lab
Y49	h+ ura4-d18 leu1-32 ade6-m216 tup11::ura4+ tup12::ura4+	Monahan Lab
D51	h+ ura4-d18 leu1-32 ade6-m216 scr1::TAP-KanMX6	This study
D52	h+ ura4-d18 leu1-32 ade6-m216 scr1::TAP-KanMX6	This study
D59	h- ura4-d18 leu1-32 ade6-m216 scr1::ura4+	This study
D60	h+ ura4-d18 leu1-32 ade6-m216 scr1::ura4+	This study
D96	h+ ura4-d18 leu1-32 ade6-m216 tup11::cTAP-KanMX6	This study
D101	h+ ura4-d18 leu1-32 ade6-m216 rst2::cTAP-KanMX6	This study
D102	h+ ura4-d18 leu1-32 ade6-m216 rst2::cTAP-KanMX6	This study
D155	h+ ura4-d18 leu1-32 ade6-m216 scr1::KanMX6	This study
D156	h- ura4-d18 leu1-32 ade6-m216 scr1::KanMX6	This study
D163	h+ scr1::KanMX6	This study
D165	h- scr1::KanMX6	This study
D177	h- scr1::TAP-KanMX6	This study
D178	h+ scr1::TAP-KanMX6	This study
D179	h90 scr1::KanMX6	This study
D181	h90 scr1::KanMX6	This study
D183	h- ura4-d18 leu1-32 ade6-m210 scr1::5xFLAG-ura4+	This study
D185	h- ura4-d18 leu1-32 ade6-m210 tup11-5xFLAG-ura4+	This study
D202	h- scr1-cTAP-KanMX6 tup11-5xFLAG-ura4+	This study
D205	h+ scr1-cTAP-KanMX6 tup11-5xFLAG-ura4+	This study
D206	h- scr1-c5xFLAG-ura4+ tup11-cTAP-KanMX6 leu1-32 ade6-m216	This study
D207	h+ scr1-c5xFLAG-ura4+ tup11-cTAP-KanMX6 leu1-32 ade6-m216	This study
SS89	h- ura4-d18 leu1-32 ade6-m210 rmt5::KanMX6	Monahan Lab
